# Supplementary material
Source: publisher figshare collection journal article supplement (https://adisjournals.figshare.com/articles/dataset/_/6015449)
Supplement: Supplementary file 1 [file 1]

## Defining the Epidemiology and Burden of Severe Respiratory Syncytial Virus Infection Among Infants and Children in Western Countries

Louis Bont • Paul A. Checchia • Brigitte Fauroux • Josep Figueras-Aloy •  
Paolo Manzoni • Bosco Paes • Eric A. F. Simões • Xavier Carbonell-Estrany

Infect Dis Ther. 2016 Sep;5(3):271-98

This slide deck represents the opinions of the authors. Sponsorship for this project was funded by AbbVie. Medical writing assistance for this study was provided by Strategen Limited. For a full list of acknowledgments and conflicts of interest for all authors of this article, please see the full text online. Copyright © The Authors 2017. Creative Commons Attribution Noncommercial License (CC BY-NC).

## Abbreviations

- ARI: Acute respiratory infection
- hBoV: Human bocavirus
- hMPV: human metapneumovirus
- ICU: Intensive care unit
- LOS: Length of stay
- MV: Mechanical ventilation
- REGAL: RSV Evidence — a Geographical Archive of the Literature
- RV: Rhinovirus
- RSV: Respiratory syncytial virus
- RSVH: Respiratory syncytial virus hospitalization
- SOE: Strength of Evidence
- wGA: weeks' gestational age

## REGAL 1: Overall Epidemiology and Burden of RSV

- Target population was previously healthy term children or studies with mixed populations of term and preterm (<37 wGA) children and those with comorbidities
- Short-term outcomes of interest included:
  - Hospitalization rates due to severe RSV
  - Hospital LOS
  - ICU admission and LOS
  - Oxygen requirement
  - Need for and duration of MV and/or non-invasive ventilation
  - Case-fatality rates
  - Risk factors for severe RSVH

‘What is the disease burden of RSV infection in Western countries, and what are the associated risk factors for severe disease?’

## Systematic Review

- 2,315 studies\* were identified of which 98 were included

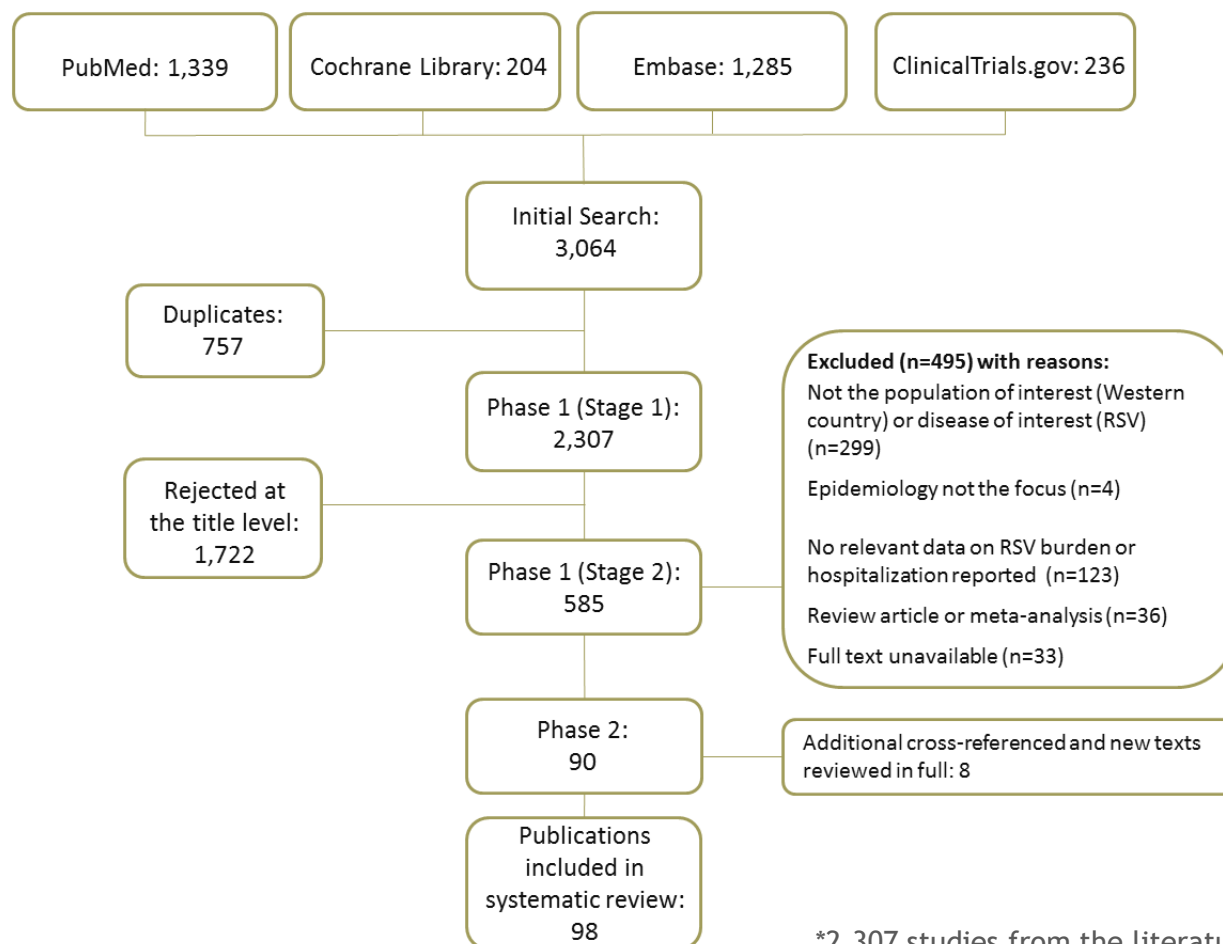

\*2,307 studies from the literature search (excluding duplicates) plus 8 additional cross-references

## RSV is a major cause of infant hospitalization (high SOE)

RSV has been associated with

12-63%  
of all ARIs

19-81%  
of all viral ARIs

Hospitalization rates for RSV ARIs  
increased with decreasing age

≤1 year  
3.2-42.7  
/1000/year

1-4 years  
0.6-7.8  
/1000/year

Of children hospitalized with  
RSV-related ARI/bronchiolitis

>70%

had no underlying medical  
conditions

75-90% of RSVHs were in infants ≤12 months

## Annual incidence of RSVH varies over time (moderate SOE)

- In temperate, northern hemisphere countries, the RSV season typically starts in **October** or **November**, peaks between **December** and **February** and ends in **March** or **April**
- The annual incidence of RSVH varied over time; some longitudinal studies reported an **increase**, some a **decrease**, and others **relative stability**
- Season-on-season RSVH rates varied by up to a factor of **2** to **3** in the same geographic region

Highlighted the need for rigorous and uniform longitudinal surveillance

## RSV is associated with a high rate of co-infection (high SOE)

- RSV has shown a high rate of co-infection with respiratory viruses with similar seasonal patterns

e.g. influenza, RV, hMPV, HBoV as well as bacterial pathogens

- Some studies reported that multiple infections were associated with more severe disease than with single RSV infections. Others found the opposite relationship or no differences

Co-infections have been reported to occur in up to

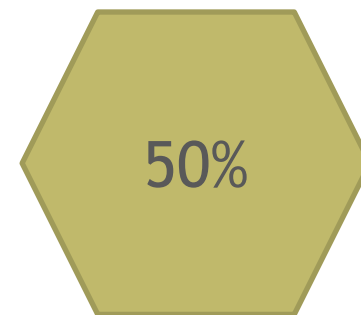

of RSV-hospitalized children

Co-infections represented a major confounder in burden of disease analyses of RSV infection

RSV is associated with significant morbidity (moderate SOE)

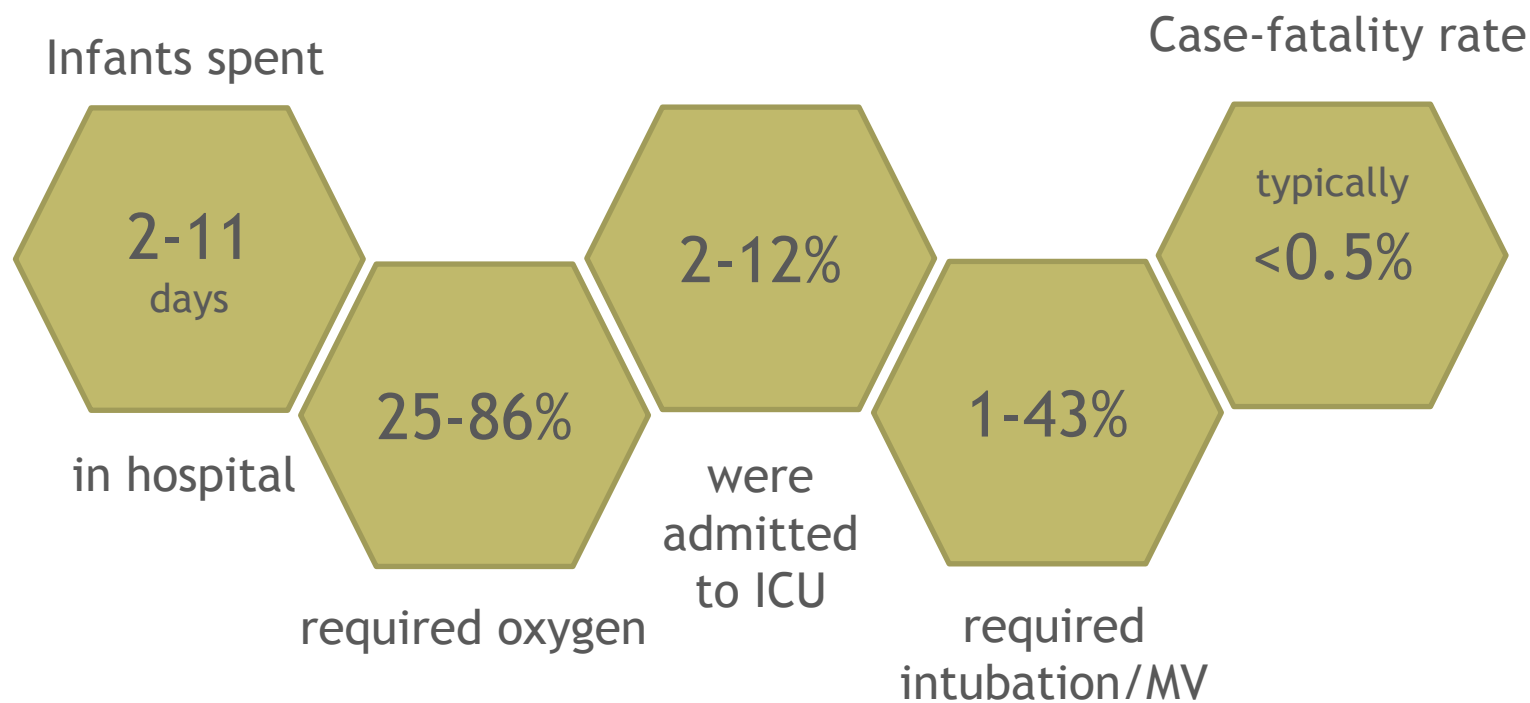

RSV ARI has been associated with more severe disease than non-RSV ARI



Several independent risk factors for RSVH have been identified (high SOE)

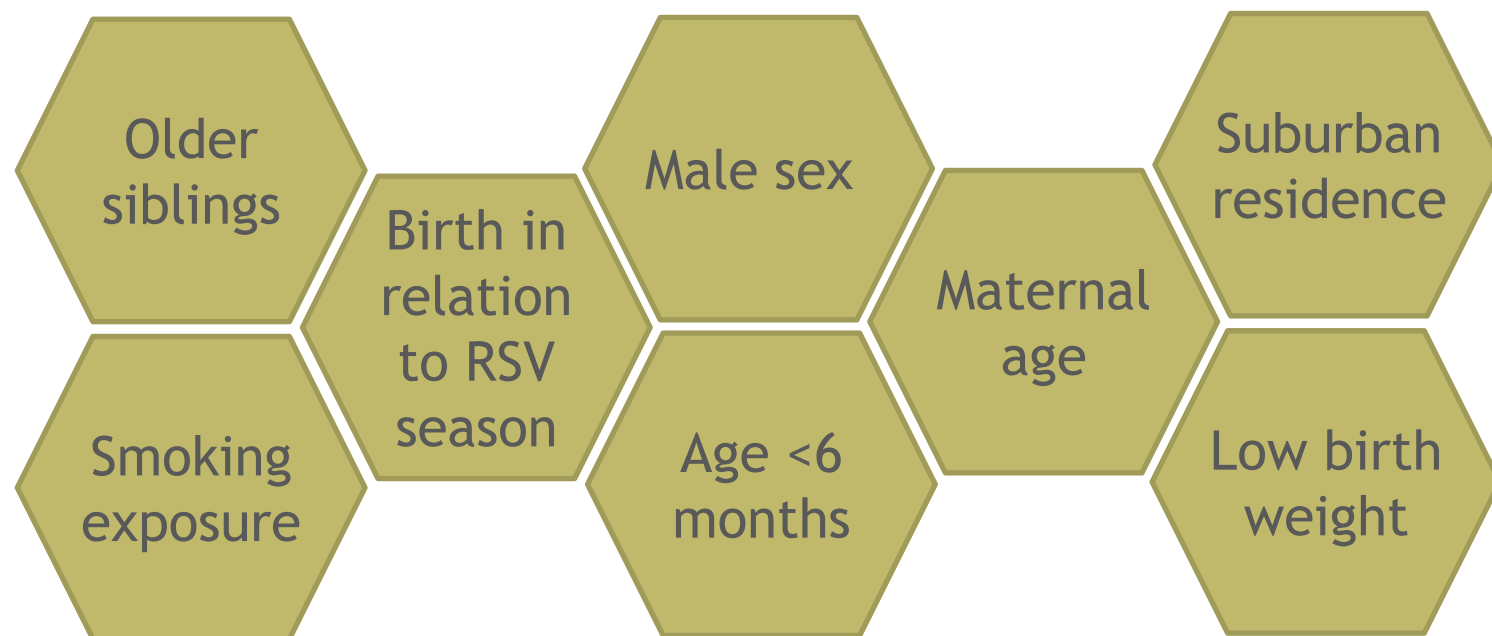

Risk factors are important to identify strategies to prevent infections and to inform guidelines for RSV prophylaxis

| Key statements/Findings                                                                                                                                                                                  | Level of Evidence |
|----------------------------------------------------------------------------------------------------------------------------------------------------------------------------------------------------------|-------------------|
| In western countries, RSV has been associated with 12-63% of all ARIs and 19-81% of viral ARIs causing hospitalization in children                                                                       | 1                 |
| Annual hospitalization rates for RSV-associated ARIs ranged from 3.2/1000 children to 42.7/1000 in the first year of life, and decreased with decreasing age to 0.6/1000-1.78/1000 in children 1-4 years | 1                 |
| Longitudinal studies have reported varying annual incidences of RSVH over time: some have reported an increase, some a decrease, and others relative stability                                           | 2                 |

RSVH is associated with significant morbidity and represents a large burden of disease in Western countries

| Key statements/Findings                                                                                                                                                                                                                            | Level of Evidence |
|----------------------------------------------------------------------------------------------------------------------------------------------------------------------------------------------------------------------------------------------------|-------------------|
| RSV co-infections were frequent (bacterial and viral co-infections have been reported in up to 50% of patients hospitalized with severe RSV ARI). However, the relationship with severity of disease was not clear                                 | 1                 |
| Infants spend an average of 2-11 days in hospital for RSV ARIs, approximately 2-12% are admitted to the ICU, and the mortality rate is <0.5% and limited to children with severe comorbidity                                                       | 1/2               |
| A number of risk factors have been independently associated with an increased risk for severe RSV disease in children, including: male sex; age <6 months; birth during the first half of the RSV season; crowding; siblings and day-care exposure | 1                 |

RSVH is associated with significant morbidity and represents a large burden of disease in Western countries

## Further development

- Key areas for research:
  - Epidemiological studies to determine the true burden of severe RSV disease, particularly in the outpatient setting
  - Impact of co-infections on severity of disease
  - Case-fatality rates and associated risk factors such as RSV seasons
  - Geographical differences in RSV epidemiology
- Well-coordinated surveillance programs with high RSV testing rates for inpatients and outpatients would be the ideal
- Development of more effective preventative strategies - in high-risk and healthy children - is essential to reduce the overall burden of RSVH

## Acknowledgments

- Dr Joanne Smith, Julie Blake and Dr Barry Rodgers-Gray from Strategen Limited undertook the systematic review following the protocol approved by the authors and were funded by AbbVie.
- All named authors meet the International Committee of Medical Journal Editors (ICMJE) criteria for authorship for this manuscript, take responsibility for the integrity of the work as a whole, and have given final approval to the version to be published.
- Editorial assistance in the preparation of this manuscript was provided by Julie Blake and Dr Barry Rodgers-Gray. They developed a first draft of the manuscript, based on the results of the systematic review and input/approval from all authors, which was initially edited by X. Carbonell-Estrany and L. Bont and then circulated among the other authors for input, further edits and subsequent approval. Support for this assistance was funded by AbbVie.
- AbbVie had the opportunity to review and comment on the completed manuscript but final editorial control rested fully with the authors.
- Article processing charges for this study were funded by Abbvie.

## Disclosures

The institute of L. Bont received money for investigator initiated studies by MeMed, Astra Zeneca, AbbVie, and Janssen. The institute of L. Bont received money for consultancy by Astra Zeneca, AbbVie, MedImmune, Janssen, Gilead and Novavax. P. Checchia has acted as an expert advisor and speaker for AbbVie and has received honoraria in this regard. He has also received research Grant funding from AstroZeneca. B. Fauroux has received compensation as a neonatology board member from Abbvie. J. Figueras-Aloy has acted as an expert advisor and speaker for AbbVie and has received honoraria in this regard. P. Manzoni has acted as a speaker for AbbVie, and as an expert advisor for AbbVie, TEVA, MedImmune, AstraZeneca, Janssen, and has received honoraria in this regard. B. Paes has received research funding from AbbVie Corporation and compensation as an advisor or lecturer from AbbVie and MedImmune. E.A.F Simões has received Grant funding to his institution from MedImmune Inc, Glaxo Smith Kline Inc, and received consultancy fees to the institution, from Abbvie. X. Carbonell-Estrany has acted as an expert advisor and speaker for AbbVie and has received honoraria in this regard.

## Copyright

Copyright © The Authors 2017.

This slide deck is distributed under the terms of the Creative Commons Attribution Noncommercial License which permits any noncommercial use, distribution, and reproduction in any medium, provided the original author(s) and the source are credited.
